# Supplementary material for: Clinical and genetic characterization of adult‐onset leukoencephalopathy caused by CSF1R mutations
Source: PubMed Central journal article supplement — Ann Clin Transl Neurol. 2021 Oct 15;8(11):2121–31. doi: 10.1002/acn3.51467 (PMC8607455; doi:10.1002/acn3.51467), 2021-10-15
Supplement: ACN3-8-2121-s001.pdf [file ACN3-8-2121-s001.pdf]

**Table S1. Genes in the targeted resequencing panel.**

|          |         |         |        |          |          |
|----------|---------|---------|--------|----------|----------|
| AARS2    | CTSA    | FIG4    | IFIH1  | PIGT     | SDHAF1   |
| ABCC1    | CTSD    | FOLR1   | ISCA2  | PITX2    | SERPINC1 |
| ABCC6    | CYP27A1 | FOXC1   | ITM2B  | PLP1     | SERPINE1 |
| ABCD1    | CYP2U1  | FUCA1   | JAM3   | POLG     | SLC16A2  |
| ACP5     | DARS    | GALC    | KARS   | POLH     | SLC17A5  |
| ACTA2    | DARS2   | GAN     | KIF5A  | POLR1C   | SLC2A10  |
| ACVRL1   | DDB2    | GBA     | L2HGDH | POLR3A   | SLC46A1  |
| ADA2     | DHFR    | GBE1    | LAMB1  | POLR3B   | SNORD118 |
| ADAR     | EARS2   | GCDH    | LARS2  | POLR3K   | SOX10    |
| AIMP1    | EGR2    | GFAP    | LMNB1  | PRNP     | SPG11    |
| AIMP2    | EIF2B1  | GJA1    | MAG    | PROC     | SUCLG1   |
| ALDH3A2  | EIF2B2  | GJB1    | MAN2B1 | PROS1    | SUMF1    |
| APLP1    | EIF2B3  | GJC2    | MANBA  | PROZ     | SUOX     |
| APLP2    | EIF2B4  | GLA     | MAPT   | PSAP     | SURF1    |
| APOE     | EIF2B5  | GLB1    | MARS2  | PSEN1    | TARS2    |
| APP      | ENG     | GRN     | MCOLN1 | PSEN2    | TGFBR2   |
| ARSA     | EPRS    | GSN     | MLC1   | PSENNEN  | TMEM106B |
| ASPA     | ERCC1   | GTF2E2  | MMACHC | PYCR2    | TREM2    |
| AUH      | ERCC2   | GTF2H5  | MPLKIP | RARS     | TREX1    |
| CA2      | ERCC3   | HARS2   | MPV17  | RARS2    | TTR      |
| CBS      | ERCC4   | HBB     | MRM2   | REEP1    | TUBB4A   |
| CLCN2    | ERCC5   | HEPACAM | MRPL38 | RNASEH2A | TYMP     |
| CNTNAP1  | ERCC6   | HEXA    | MTCL1  | RNASEH2B | TYROBP   |
| COA8     | ERCC8   | HEXB    | MTHFD1 | RNASEH2C | VARS2    |
| COL3A1   | F2      | HIKESHI | MTHFR  | RNASET2  | VHL      |
| COL4A1   | F5      | HMGCL   | NF1    | RNF113A  | VPS11    |
| COL4A2   | FA2H    | HSPD1   | NFU1   | RPIA     | WARS2    |
| COLGALT1 | FAM126A | HTRA1   | NKX6-2 | RRM2B    | XPA      |
| CSF1R    | FAM126A | IARS2   | NOTCH3 | SAMHD1   | XPC      |
| CST3     | FARS2   | IBA57   | NUBPL  | SARS2    |          |
| CTC1     | FBN1    | IDUA    | PEX1   | SCP2     |          |
